# Supplementary material
Source: PubMed Central journal article supplement (PMC4072346)
Supplement: bi500428j_si_001.pdf [file bi500428j_si_001.pdf]

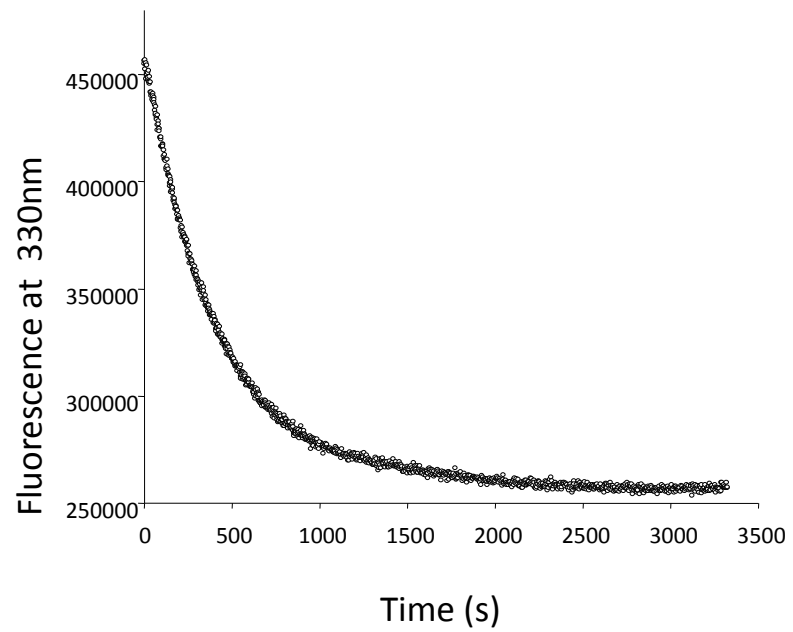

(a) Fluorescence of the tryptophan for the phosphatase domain of PHLPP2 was recorded as a function of time following treatment with 100 mM EDTA. The reduction of fluorescence reflects unfolding of the protein, exposing some tryptophans.
