# Supplementary material
Source: PubMed Central journal article supplement (PMC4072346)
Supplement: bi500428j_si_002.pdf [file bi500428j_si_002.pdf]

| <b>pH</b> | <b>Buffer</b>            |
|-----------|--------------------------|
| 2.5       | Glycine                  |
| 3.0       | Citrate                  |
| 4.7       | Acetate                  |
| 5.0       | Citrate                  |
| 5.4       | Citrate                  |
| 6.0       | Bis-Tris<br>PIPES<br>MES |
| 6.5       | Bis-Tris<br>PIPES        |
| 7.0       | Bis-Tris<br>PIPES        |
| 7.6       | Tris<br>Tricine<br>HEPES |
| 7.8       | PIPES                    |
| 8.0       | Tricine                  |
| 8.2       | Tris                     |
| 8.5       | Tris<br>Tricine          |
| 9.0       | Tris                     |
| 10.2      | CAPS                     |
| 12.2      | Glycine                  |

Supplementary Table 1: Chemical nature of the buffers for the pH-dependent experiments.
